# Supplementary material
Source: Elsevier journal article supplement (https://www.sciencedirect.com/science/article/pii/S0210569120303971)
Supplement: mmc1 [file S0210569120303971:mmc1.pdf]

## MATERIAL ADICIONAL

### Herramienta NECPAL CCOMS-ICO© (NECesidades PALiativas)<sup>14</sup>.

Se trata de un instrumento diseñado por el observatorio Qualy-ICO-CCOMS que ha sido validado en nuestro entorno. Sirve para la identificación de personas en situación de enfermedad crónica avanzada, con pronóstico de vida limitado a 12 meses, necesidad de atención paliativa en servicios de salud y sociales de cualquier tipo, y que precisan de la activación de planes específicos<sup>14</sup>. Esta herramienta se basa en 4 preguntas de respuesta dicotómica sí/no. En teoría, una vez se considera a un paciente NECPAL positivo, por definición, se consideran pacientes MACA y, en consecuencia, hay que iniciar un enfoque paliativo consistente en la aplicación de 6 pasos para una atención paliativa:

- 1.- Identificar necesidades multidimensionales.
- 2.- Practicar un modelo de atención impecable.
- 3.- Elaborar un plan terapéutico multidimensional y sistemático (cuadro de cuidados).
- 4.- Identificar valores y preferencias del enfermo: ética clínica y planificación de decisiones anticipadas (PDA).
- 5.- Involucrar a la familia y al cuidador principal.
- 6.- Realizar gestión del caso, seguimiento, atenciones continuadas y urgentes, coordinación y acciones integradas de servicios.

Hay que tener presente que este instrumento no sirve para determinar el pronóstico, ni la supervivencia, ni para rechazar medidas terapéuticas curativas proporcionadas que puedan mejorar la calidad de vida del paciente.

Así pues, las personas que se beneficiarían de utilizar dicho instrumento serían todas aquellas que sufran enfermedades crónicas evolutivas avanzadas con los diagnósticos y situaciones que a continuación se relacionan:

- Paciente oncológico especialmente afectado por la enfermedad.
- Paciente con enfermedad pulmonar crónica.
- Paciente con enfermedad cardíaca crónica.
- Paciente con enfermedad neurológica crónica: accidente vascular, Parkinson, esclerosis lateral amiotrófica, esclerosis múltiple, enfermedades de motoneurona.
- Paciente con enfermedad hepática crónica grave.
- Paciente con enfermedad renal crónica grave.
- Paciente con demencia.
- Paciente geriátrico que, a pesar de no padecer ninguna de las enfermedades citadas anteriormente, padece alguna otra enfermedad crónica grave o avanzada.
- Paciente que, sin estar incluido en los grupos anteriores, ha precisado últimamente de ser ingresado o atendido de forma domiciliaria con más intensidad de la esperable.

Se considera una identificación positiva del instrumento NECPAL a cualquier paciente con:

- a) Pregunta 1 o pregunta Sorpresa con respuesta negativa: Se trata de una pregunta intuitiva que integra comorbilidad, aspectos sociales y otros factores: ¿Le sorprendería que este paciente falleciera en los próximos 12 meses? .
- b) Y, al menos, otra pregunta (2,3 ó 4) asociada a una serie de criterios establecidos de fragilidad, gravedad y progresión con respuesta positiva.

#### HERRAMIENTA NECPAL

**1.- PREGUNTA SORPRESA:** pregunta intuitiva que integra comorbilidad, aspectos sociales y otros factores. **¿Le sorprendería que este paciente muriese en los próximos 12 meses? No/Sí.**

**2.-ELECCIÓN / DEMANDA O NECESIDAD:** explore si alguna de las siguientes dos preguntas es afirmativa:

- **Elección / Demanda:** ¿el paciente con enfermedad avanzada o su cuidador principal han solicitado explícita o implícitamente, la realización de tratamientos paliativos / de confort de forma exclusiva, proponen limitación del esfuerzo terapéutico o rechazan tratamientos específicos o con finalidad curativa? **Sí/No.**

- **Necesidad:** ¿considera que este paciente requiere actualmente medidas paliativas o tratamientos paliativos? **Sí/No.**

**3.- INDICADORES CLÍNICOS GENERALES DE SEVERIDAD O PROGRESIÓN:** explore la presencia de cualquiera de los siguientes criterios de severidad y fragilidad extrema:

- **Marcadores Nutricionales**, cualquiera de los siguientes en los **últimos 6 meses:** **Sí/No**

- Severidad: albúmina sérica < 2.5 g/dl, no relacionada con descompensación aguda.
- Progresión: pérdida de peso > 10%.
- Impresión clínica de deterioro nutricional o ponderal sostenido, intenso/severo, progresivo, irreversible y no relacionado con proceso intercurrente.

- **Marcadores Funcionales**, cualquiera de los siguientes en los **últimos 6 meses:** **Sí/No**

- Severidad: dependencia funcional grave establecida (Barthel<sup>5</sup> < 2 (5), ECOG<sup>6</sup> (6) > 2 ó Karnofsky<sup>7</sup> (7) < 50%). **Tablas 1,2 y 3.**
- Progresión: pérdida de 2 o más ABDV (Actividades Básicas de la Vida Diaria) a pesar de intervención terapéutica adecuada. Las actividades básicas de la vida diaria (ABVD) se caracterizan por ser universales, estar ligadas a la supervivencia y condición humana, a las necesidades básicas, estar dirigidas a uno mismo y suponer un mínimo esfuerzo cognitivo, automatizándose su ejecución tempranamente (alrededor de los 6 años), con el fin de lograr la independencia personal. Habitualmente dentro de las ABVD se incluyen la alimentación, el aseo, baño, vestido, movilidad personal, sueño y descanso<sup>8</sup> (8).

- Impresión clínica de deterioro nutricional o ponderal sostenido, intenso/severo, progresivo, irreversible y no relacionado con proceso intercurrente.
- **Otros marcadores de severidad y fragilidad extrema**, al menos 2 de los siguientes en los **últimos 6 meses: Sí/No**
  - Úlceras por decúbito persistentes<sup>9</sup> (9) (estadio III-IV). **Tabla 4.**
  - Infecciones con repercusión sistémica de repetición (>1).
  - Síndrome confusional agudo.
  - Disfagia persistente.
  - Caídas (>2).
- **Distrés emocional** presente con síntomas psicológicos sostenidos, intensos/severos, progresivos y no relacionados con proceso intercurrente agudo. **Sí/No**
- **Factores adicionales de uso de recursos**, cualquiera de los siguientes: **Sí/No**
  - 2 ó más ingresos urgentes (no programados) en centros hospitalarios o sociosanitarios por enfermedad crónica en el último año.
  - Necesidad de cuidados complejos/intensos continuados, bien sea en una institución o en domicilio.
- **Comorbilidad**: 2 o más patologías concomitantes. **Sí/No**

**4.- INDICADORES CLÍNICOS ESPECÍFICOS DE SEVERIDAD Y PROGRESIÓN POR PATOLOGÍAS:** explore la presencia de criterios de mal pronóstico para las siguientes patologías seleccionadas:

- **ENFERMEDAD ONCOLÓGICA**, sólo requiere la presencia de un criterio: **Sí/No**
  - Diagnóstico confirmado de cáncer metastático (estadio IV) y algunos casos, como las neoplasias de pulmón, páncreas, gástrica y esofágica, también en estadio III, que presenten: escasa respuesta o contraindicación de tratamiento específico, brote evolutivo en transcurso de tratamiento o afectación metastásica de órganos vitales (SNC, hígado, pulmonar masiva, etc.)
  - Deterioro funcional significativo (Palliative Performance Status<sup>10</sup> (10) (PPS) < 50%). **Tabla 5.**
  - Síntomas persistentes mal controlados o refractarios, a pesar de optimizar el tratamiento específico.
- **ENFERMEDAD PULMONAR CRÓNICA**, presencia de dos o más los siguientes criterios: **Sí/No**
  - Disnea de reposo o de mínimos esfuerzos entre exacerbaciones.
  - Síntomas físicos o psicológicos de difícil manejo a pesar de tratamiento óptimo bien tolerado.
  - En caso de disponer de pruebas funcionales respiratorias, criterios de obstrucción severa (Volumen Espiratorio Forzado en el primer segundo: FEV1 < 30%) o criterios de déficit restrictivo (Capacidad Vital forzada < 40% / Capacidad de difusión pulmonar: DLCO < 40%).
  - En caso de suponer de gasometría basal arterial, cumplimiento de criterios de oxigenoterapia domiciliaria o estar actualmente realizando este tratamiento en casa.
  - Insuficiencia cardíaca sintomática asociada.

- Ingresos hospitalarios recurrentes (> 3 ingresos en 12 meses por exacerbaciones de Enfermedad Pulmonar Obstructiva Crónica)

- **ENFERMEDAD CARDÍACA CRÓNICA**, presencia de dos o más los siguientes criterios:  
Sí/No

- Insuficiencia cardíaca NYHA<sup>11</sup> (11) estadio III ó IV, enfermedad valvular severa o enfermedad coronaria extensa no revascularizable. **Tabla 6.**
- Disnea o angina de reposo o a mínimos esfuerzos.
- Síntomas físicos o psicológicos de difícil manejo, a pesar de tratamiento óptimo bien tolerado.
- En caso de disponer de ecocardiografía: fracción de eyección severamente deprimida (< 30%) o hipertensión pulmonar severa (Presión Arteria Pulmonar sistólica > 60mmHg).
- Insuficiencia renal asociada (Filtrado Glomerular < 30 l/min).
- Ingresos hospitalarios con síntomas de insuficiencia cardíaca o cardiopatía isquémica recurrentes (> 3 último año).

- **ENFERMEDADES NEUROLÓGICAS CRÓNICAS (1): Accidente Vascular Cerebral (AVC).**  
Sólo requiere la presencia de un criterio: Sí/No

- Durante la fase aguda y subaguda (< 3 meses post-AVC): estado vegetativo persistente o de mínima consciencia > 3 días.
- Durante la fase crónica (> 3 meses post-AVC): complicaciones médicas repetidas (neumonía por aspiración, a pesar de medidas antidisfagia), infección urinaria de vías altas (pielonefritis) de repetición (>1), fiebre recurrente a pesar de antibióticos (fiebre persistente post > 1 semana de antibiótico), úlceras por decúbito estadio 3-4 refractarias o demencia con criterios de severidad post-AVC.

- **ENFERMEDADES NEUROLÓGICAS CRÓNICAS (2): Esclerosis Lateral Amiotrófica y Enfermedades de la Motoneurona, Esclerosis Múltiple y Parkinson.** Presencia de dos o más de los siguientes criterios: Sí/No

- Deterioro de la función física y cognitiva, a pesar de tratamiento óptimo.
- Síntomas complejos y difíciles de controlar.
- Problemas en el habla / aumento de la dificultad para comunicarse.
- Disfagia progresiva.
- Neumonía por aspiración recurrente, disnea o insuficiencia respiratoria.

- **ENFERMEDADES HEPÁTICA CRÓNICA GRAVE:** sólo requiere la presencia de un criterio: Sí/No

- Cirrosis avanzada: estadio Child<sup>12</sup> (12) C ,determinado en ausencia de complicaciones y habiéndolas tratado y optimizando tratamiento, (**Tabla 7**) , puntuación de MELD-Na<sup>13</sup> (13) > 30 (**Tabla 8**) o con más de las siguientes complicaciones médicas: ascitis, síndrome hepatorenal o hemorragia digestiva alta por hipertensión portal persistente con fracaso al tratamiento farmacológico y endoscópico y no candidato a shunt transyugular intrahepático portosistémico (TIPS), en pacientes no candidatos a trasplante.
- Carcinoma hepatocelular: presente, en estadio C o D.

- **ENFERMEDADES RENAL CRÓNICA GRAVE:** sólo requiere la presencia de un criterio

: **Sí/No**

- Insuficiencia renal grave (Filtrado Glomerular < 15) en pacientes no candidatos a tratamiento sustitutivo y/o trasplante.
- **DEMENCIA:** requiere la presencia de dos o más de los siguientes criterios : **Sí/No**
- Criterios de severidad: incapacidad para vestirse, lavarse o comer sin asistencia (GDS/FAST 6c)<sup>14</sup> (14), aparición de incontinencia doble (GDS/FAST 6d-e) o incapacidad de hablar o comunicarse con sentido -6 o menos palabras inteligibles- (GDS/FAST 7). **Tabla 9.**
  - Criterios de progresión: pérdida de 2 o ABVD en los últimos 6 meses, a pesar de intervención terapéutica adecuada (no valorable en situación hiperaguda por proceso intercurrente) o aparición de dificultad para tragar, o negativa a comer, en pacientes que no recibirán nutrición enteral o parenteral.
  - Criterio de uso de recursos: múltiples ingresos (> 3 en un año, por procesos intercurrentes que condicionen deterioro funcional y/o cognitivo: neumonía aspirativa, pielonefritis, septicemia, etc...).
